# Supplementary material for: Pseudomonas spp. Producing Antimicrobial Compounds Regulate Fungal Communities Inhabiting Wheat Crown in Southern Chile
Source: MDPI journal article supplement (doi:10.3390/agronomy12030710), 2022-03-15
Supplement: s1 [file s1]

## Supplementary Materials

**Table S1.** List of PCR primers used in this study

| Function                                                       | Primers                 | Primer Sequence                                                                         | Reference [number in reference list] |
|----------------------------------------------------------------|-------------------------|-----------------------------------------------------------------------------------------|--------------------------------------|
| <b>Fungi identification</b>                                    |                         |                                                                                         |                                      |
| Identification of genus <i>Gaeumannomyces</i> isolates.        | NS5<br>GGT-RP           | 5' AACTTAAAGGAATTGACGGAAG 3'<br>5'-TGCAATGGCTTCGTGAA-3'                                 | Fouly and Wilkinson [38]             |
| <i>Fusarium graminearum</i>                                    | Fg16NF<br>Fg16NR        | 5'-ACA GAT GAC AAG ATTCAG GCA CA -3'<br>5'-TTC TTT GAC ATC TGT TCA ACC CA -3'           | Scott et al. [37]                    |
| <i>F. pseudograminearum</i>                                    | Fp1-1<br>Fp1-2          | 5'- CGG GGT AGT TTC ACA TTT CCG -3'<br>5'- GAG AAT GTG ATG ACG ACA ATA -3'              | Scott et al. [37]                    |
| <i>F. avenaceum</i>                                            | FAITSF<br>FAITSR        | 5'- CCA GAG GAC CCA AAC TCT AA -3'<br>5'- ACC GCA GAA GCA GAG CCA AT -3'                | Scott et al. [37]                    |
| <i>F. culmorum</i>                                             | Fc01F<br>Fc01R          | 5'- ATG GTG AAC TCG TCG TGG C -3'<br>5'- CCC TTC TTA CGC CAA TCT CG v                   | Scott et al. [37]                    |
| <i>F. acuminatum</i>                                           | FAC-F<br>FAC-R          | 5'- GGG ATA TCG GGC CTC A -3'<br>5'- GGG ATA TCG GCA AGA TCG -3'                        | Scott et al. [37]                    |
| Region ITS                                                     | 18SF2<br>pITS4          | 5'-TTCTTCGCTTATTGATATGC-3'<br>5'-CGAACTCGGTCGTTTAGAGG-3'                                |                                      |
| <b>Bacteria identification</b>                                 |                         |                                                                                         |                                      |
| Identification <i>phzCD</i> gene (Phenazine-1-carboxylic acid) | PCA2a<br>PCA3b          | 5'-TGCCAAGCCTCGCTCCAAC-3'<br>5'-CGCGTTGTTCCTCGTTTCAT-3'                                 | Raaijmakers et al. [40]              |
| Identification <i>phlD</i> gene (2,4-diacetylphloroglucinol)   | B2BF<br>BPR4            | 5'- ACC CAC CGC AGC ATC GTT TAT GAG C -3'<br>5'- CCG CCG GTA TGG AAG ATG AAA AAG TC -3' | McSpadden Gardener et al. [39]       |
| <i>phlD</i> genotype A                                         | A-Align<br>A-gen-extend | 5'- TGT TGC CGG CTT CCG ACA GGC TGC -3'<br>5'- GAC ATT CGC ATG GTG ATC GTC ACT -3'      | De La Fuente et al. [18]             |
| <i>phlD</i> genotype B                                         | B-gen long<br>B2BF      | 5'- CTT GAA TCC CGG CGC CTT ATC G -3'<br>5'- ACC CAC CGC AGC ATC GTT TAT GAG C -3'      | De La Fuente et al. [18]             |
| <i>phlD</i> genotype D                                         | D-gen-2<br>B2BF         | 5'- GCA GGA AGT AAG ACC CGG TA -3'<br>5'- ACC CAC CGC AGC ATC GTT TAT GAG C -3'         | De La Fuente et al. [18]             |
| <i>phlD</i> genotype K                                         | BPR4<br>K-gen           | 5'- CCG CCG GTA TGG AAG ATG AAA AAG TC -3'<br>5'- ACC ACC GAC GAC ATT CGA -3'           | De La Fuente et al. [18]             |
| <i>phlD</i> genotype L                                         | L1-extend<br>B2BF       | 5'- CTC GCT ATC AGG CAG GAA GTA AGA A -3'<br>5'- ACC CAC CGC AGC ATC GTT TAT GAG C -3'  | De La Fuente et al. [18]             |
| <i>phlD</i> genotype P                                         | BPR4<br>P-gen           | 5'- CCG CCG GTA TGG AAG ATG AAA AAG TC -3'<br>5'- CGA GCC AAT GAT TTT GCT -3'           | De La Fuente et al. [18]             |
